# Supplementary material
Source: PubMed Central journal article supplement (PMC7610405)

mtSSB (SSPB1)

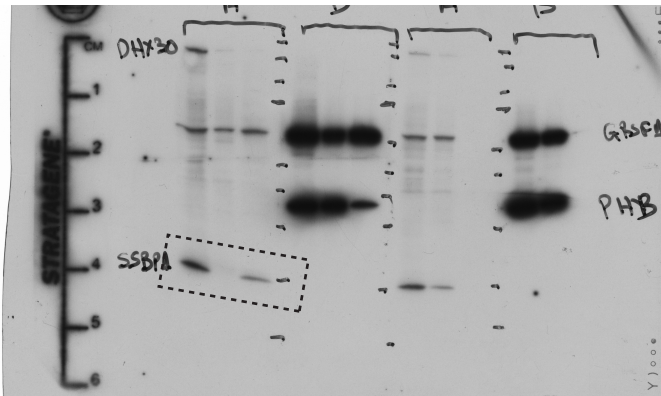

GRSF1 / PHB

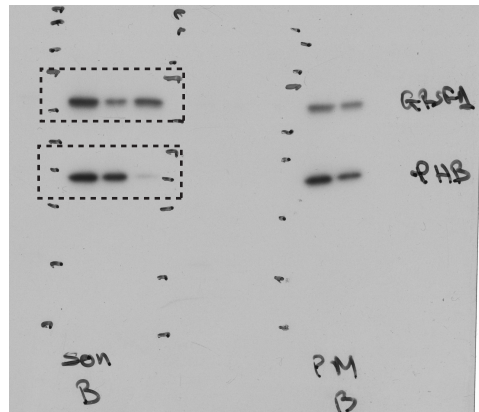

FASTKD5 (D5)

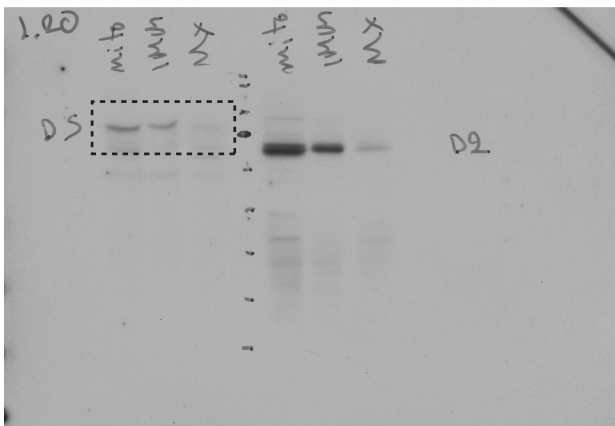

FASTKD2 (D2)

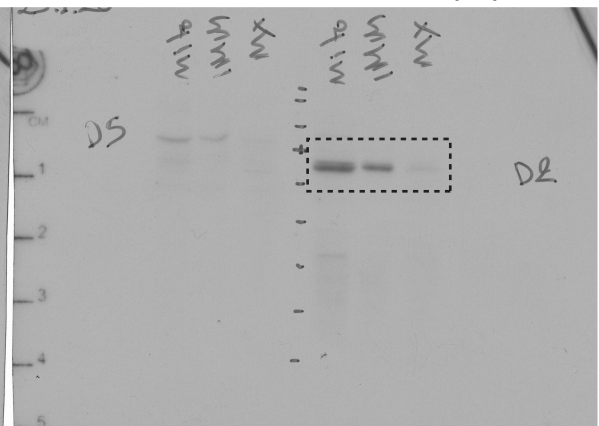

PDHE1a

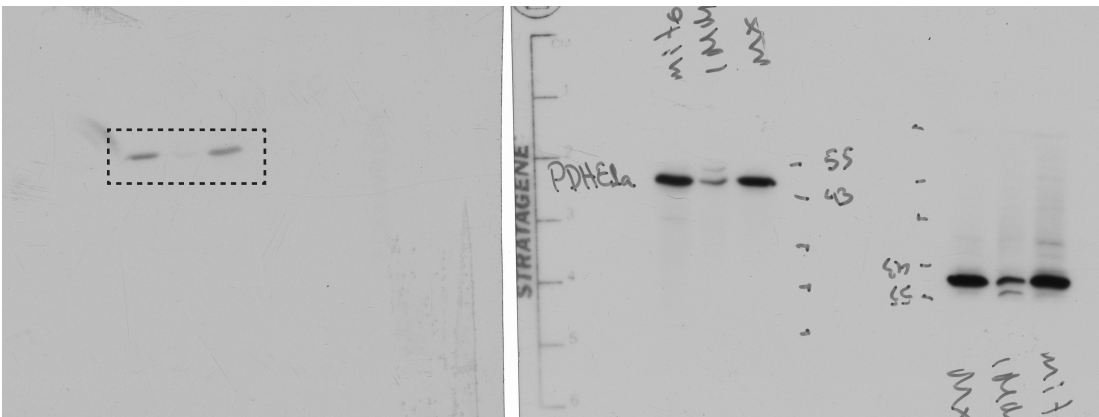

TFAM

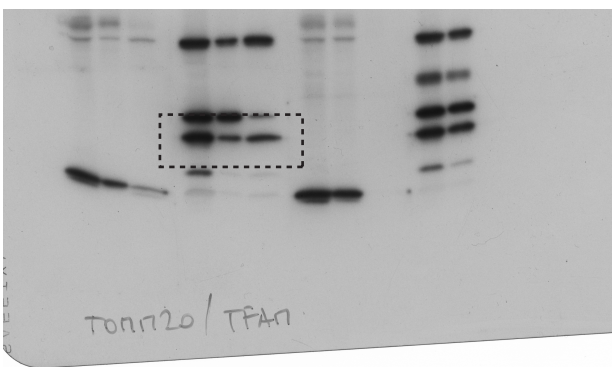

complex IV (COX4)

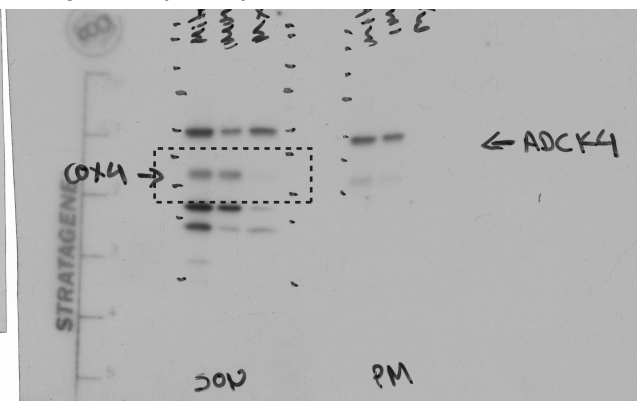

Supplement: EMS118422-supplement-Source_Data_Unmodified_Gels_Figure_3.pdf [file EMS118422-supplement-Source_Data_Unmodified_Gels_Figure_3.pdf]
